1 **Defending as a unit: sex- and context-specific territorial defence in a duetting bird**

2 Lucia Mentesana<sup>1\*†</sup>, Maria Moiron<sup>1,2†</sup>, Ernesto Guedes<sup>3</sup>, Enzo Cavalli<sup>3</sup>, Bettina Tassino<sup>3</sup>,

3 Nicolas M. Adreani<sup>1,4†</sup>

4

5 <sup>1</sup> Max Planck Institute for Ornithology, Seewiesen, Germany.

6 <sup>2</sup> Centre d'Ecologie Fonctionnelle et Evolutive, UMR 5175 Campus CNRS, Montpellier,  
7 France.

8 <sup>3</sup> Facultad de Ciencias, Universidad de la República, Montevideo, Uruguay.

9 <sup>4</sup> Konrad Lorenz Research Center, University of Vienna, Grünau im Almtal, 4643, Austria

10 \* Author for correspondence: [lmentesana@orn.mpg.de](mailto:lmentesana@orn.mpg.de)

11 † Contributed equally to the manuscript

12

13 **Abstract**

14 Behaviours such as territorial defence represent functionally integrated traits that underlie  
15 multiple behavioural variables such as physical and acoustic responses. Characterizing the  
16 multivariate structure of such traits is fundamental to understand their evolution. In bird  
17 species that form stable pair bonds and are territorial year-round, both sexes are expected to  
18 defend their territory; however, the role that each sex plays in defending their shared territory  
19 remains largely unknown. Evidence for the sex-roles during territorial defence is mixed and  
20 sex- and context-specific characterizations of territorial defence embracing the multivariate  
21 nature of the trait are currently lacking. Here we investigated sex- and context-specific  
22 variation in a hypothesised latent variable called “territorial defence” and tested whether duets  
23 were part of territorial defence in a wild population of rufous horned ( *Furnarius rufus* ). To  
24 do so, we combined a simulated territorial intrusion approach during nest building and  
25 provisioning contexts with a structural equation modelling approach. Our results showed that,  
26 in males and females, the six measured behavioural variables were linked by a single latent  
27 trait, territorial defence, in both contexts. Flights over the decoy and duet songs were equally  
28 good proxies of territorial defence. Although males were defending more the territory than  
29 females, pair members showed a positive correlation in their behaviour. The structural  
30 equation modelling framework enabled us to capture a complex correlation pattern among  
31 behavioural variables, expanding upon a classic body of research on territorial defence. Thus,  
32 the combination of classical behavioural approaches with sophisticated statistical analyses  
33 brings new exciting possibilities to the field of behavioural ecology.

34 **Keywords:** territorial aggression, duets, behavioural character, phenotypic integration, female  
35 aggression, structural equation analysis

36 **Significance statement**

37 Territorial defence is a key behaviour in territorial species as it plays a major role in an  
38 individual's reproductive success and survival. Additionally, territorial defence has been  
39 proposed as one possible evolutionary driver of duetting behaviour, one of the most  
40 fascinating vocal behaviours in birds. As behaviours are evolutionary characters, they must be  
41 studied in a multivariate framework. In this study we focused on characterizing territorial  
42 defence during a simulated territorial intrusion in an integrative manner using a classical  
43 territorial intrusion framework. We did so in male and female rufous horneros (Aves:  
44 *Furnaridae*) across two breeding contexts, while simultaneously testing theoretical  
45 predictions about the role of duetting behaviour as key part of territorial defence. Overall, our  
46 study provides for the first time a sex- and context-comparison of the multivariate, latent  
47 variable "territorial defence" in duetting birds, while highlighting the potential of combining  
48 field behavioural approaches with structural equation modelling.

49

## 50 **Introduction**

51 Behaviours, such as territorial defence, are typically studied by simultaneously measuring  
52 different observable variables (e.g. “number of attacks”, “latency of response”, “proximity”  
53 measures, and/or “vocal responses”; Wingfield 1994; Bollen 2002). Extensive empirical  
54 research over the last decades has focused on analyzing male and, to a lesser extent, female  
55 territorial defence behaviour using different approaches. Evidence generally shows that  
56 multiple components of an animal's defence response in a territory intrusion are intercorrelated  
57 (e.g. Huntingford 1976; Sprenger et al. 2012). When these multiple behaviours are  
58 functionally related, they might be considered expressions of a single evolutionary character  
59 (Araya-Ajoy and Dingemanse 2013). Their study should therefore not be addressed by means  
60 of bivariate correlations but integrate the multivariate nature of the behaviour by quantifying  
61 unobserved, biologically-relevant latent variables (Houle et al. 2011; Carter and Feeney 2012;  
62 Araya-Ajoy and Dingemanse 2013). One way to characterize “territorial defence” as an  
63 evolutionary character while also quantifying which of the observed behavioural variables  
64 should be considered expressions of it, is to apply a Structural Equation Modelling approach  
65 (SEM; e.g. Card and Little 2007). This statistical framework allows to explore complex  
66 correlation patterns among multiple behavioural variables, and to test *a priori* defined  
67 hypotheses of how multiple observed behavioural variables are linked by the unmeasured  
68 latent variable (Araya-Ajoy and Dingemanse 2013).

69 Territorial defence behaviour has been widely studied in diverse organisms from  
70 insects to several groups of vertebrates (reviewed in Smith and Blumstein 2008), likely  
71 because of its impact on fitness (Stamps and Krishnan 1997; Smith and Blumstein 2008).  
72 During territory defence, aggressive interactions can be beneficial for both males and females  
73 because an intrusion of a conspecific into the breeding territory might, for example, lead to  
74 loss of limited resources (Stamps and Krishnan 1997; Garcia and Arroyo 2002). Nevertheless,  
75 the sex-specific contribution to territory defence differs among species according to variation  
76 in mating systems and parental care (Emlen and Oring 1977; Clutton-Brock and Vincent  
77 1991; Owens and Thompson 1994). In birds, among those species that form stable pair bonds  
78 and are territorial year round, it is expected that males and females equally contribute to  
79 territory defence (Greenberg and Gradwohl 1983). In line with this prediction, in dot-winged  
80 antwrens (*Microrhoptia quixensis*) and in the purple-crowned and red-backed fairy-wrens  
81 (*Malurus coronatus*, *Malurus melanocephalus*) both sexes contribute to the same extent to  
82 defend their territory (Greenberg and Gradwohl 1983; Hall and Peters 2008; Dowling and  
83 Webster 2016). However, these findings were not observed in other antbird species

84 (*Phaenostictus mcleannani*, Willis 1972; *Cercomacra tyrannina*; Morton and Derrickson  
85 1996; *Hylophylax naevioides*; Bard et al. 2002; *Myrmeciza longipes*; Fedy and Stutchbury  
86 2005), in the zenaida dove (*Zenaida aurita*; Quinard and Cézilly 2012) and in the rufous  
87 hornero (*Furnarius rufus*; Diniz et al. 2018), where males engaged more in defensive  
88 interactions than females. In addition, whilst intensity of territorial defence can be positively  
89 correlated within pairs in some species (especially on those that duet e.g. Logue 2005; Hall  
90 and Peters 2008), in others the opposite relationship is true (e.g. zenaida dove; Quinard and  
91 Cézilly 2012). Therefore, the generality of sex-specific territorial defence as well as its  
92 intensity from both members of a pair remains poorly understood in species that are socially  
93 monogamous and territorial year-round. Furthermore, it also remains largely unknown  
94 whether the same observed behavioural variables characterize the latent variable territorial  
95 defence in males and females and across different breeding contexts. For instance, it is still an  
96 open question whether territorial defence is equally characterized by physical and vocal  
97 behaviours in both sexes and across contexts. Studies describing territorial defence as a latent  
98 variable using SEM and explaining broader patterns of territorial defence across sexes or  
99 contexts, will help to shed light on these questions and further our understanding of the  
100 evolution of male and female defence of territory.

101 While physical displays are considered the main defensive responses, the role of vocal  
102 displays as defensive signals remains under discussion (see Searcy and Beecher 2009; Naguib  
103 and Mennill 2010). Among the vocal displays that take place during agonistic interactions,  
104 perhaps the most fascinating one is duetting – occurring in around 18% of avian species  
105 worldwide (Tobias et al. 2016). Duets are defined as coordinated vocal interactions between  
106 two individuals - usually a male and female of a pair - that occur with a given temporal  
107 precision (Farabaugh 1982; Hall 2004). Duets are hypothesised to represent an important  
108 component of territorial defence (Langmore 1998; Hall 2004). In particular, the “joint  
109 territorial defence” hypothesis, proposed as one evolutionary driver of duetting behaviour  
110 (Wickler and Seibt 1980), postulates that duets allow pairs to cooperatively defend resources  
111 from conspecific intruders (Robinson 1949; reviewed by Hall 2004). A central prediction of  
112 the “joint territorial defence” hypothesis is that duets are threatening signals, stronger than  
113 solo songs (Hall 2004). To date, few studies investigated duetting in the context of territorial  
114 defence across different life-history stages (Topp and Mennill 2008; Odom et al. 2017;  
115 Quirós-Guerrero et al. 2017; Sosa-López et al. 2017; Diniz et al. 2018). The few that did so  
116 used mainly three methods: i) context criterion (i.e. which compares responses towards  
117 acoustic stimuli that represent different contexts, like only male/female solo songs, only duet

118 songs or only heterospecific songs; e.g. Dowling and Webster 2016), ii) response criterion  
119 (i.e. which compares responses with and without a playback stimulus e.g. Hall and Peters  
120 2008), and iii) correlation methods (i.e. which applies correlation techniques and principal  
121 component transformations on behavioural data, e.g. Kolof and Mennil 2013). However, none  
122 of the abovementioned methods allow to test the role that duets play in the context of  
123 territorial defence while embracing the multivariate nature of this traits as a latent variable.

124 We conducted simulated territorial intrusions (STI) in the territory of focal pairs of  
125 rufous horneros during two contexts in the breeding season: nest building and chick  
126 provisioning. The rufous hornero, hereafter hornero, is a single brooded furnarid bird species  
127 that is widely distributed throughout southern South America (Fraga 1980). Horneros are  
128 territorial year round, socially monogamous (Fraga 1980; Diniz et al. 2018) and both  
129 members of the pair are involved in defending their territory (Fraga 1980; Diniz et al. 2018).  
130 Indeed, all breeding behaviours studied in horneros so far are performed in an equitable and  
131 coordinated manner between sexes, such as incubation, parental care-related activities and  
132 even territorial defence in non-breeding context (Fraga 1980; Massoni et al. 2012; Diniz et al.  
133 2020). Also, previous studies on this species suggest that duets have a territorial function  
134 (Diniz et al. 2018, 2019, 2020). However, these studies were either acoustic-centered (Diniz  
135 et al. 2018, 2019) or carried out during a non-breeding season (Diniz et al. 2020), and none of  
136 them considered the multivariate nature of territorial defence.

137 The main goals of our study were first to characterize the multivariate nature of  
138 territorial defence in male and female horneros, and to test whether duets were indeed part of  
139 the defence displays during a territorial intrusion. Our second goal was to quantify phenotypic  
140 variation across sexes, breeding contexts and pair members. Our third goal was to evaluate the  
141 level of coordination between sexes during territorial defence. To do so, we constructed a  
142 series of structural equation models where we tested three hypotheses of potential associations  
143 among the behavioural variables: model 1 hypothesised that each territorial defence behaviour  
144 is independent and not part of a functional unit or evolutionary character; model 2  
145 hypothesises that one latent variable, “territorial defence”, underlies the relationships between  
146 all behavioural variables; and model 3 hypothesises that all behavioural variables except  
147 number of duet songs are linked by the latent variable “territorial defence”. These models  
148 were therefore specifically constructed to test the “joint territorial defence” hypothesis (Hall  
149 2009). According to this hypothesis, for our first aim, we predicted duets to be part of the  
150 latent trait ‘territorial defence’ and to be more relevant than solo songs. We also predicted that  
151 territorial defence will be characterized by the same behavioural traits (i.e. number of duets,

152 number of flights over the decoy, times spent within 5m of the decoy, number of solo songs,  
153 time spent on nest) in males and females. Second, we predicted that in our STIs males would  
154 defend more their territories than females. This was based on the notion that, although in  
155 neotropical birds there is mixed evidence for the sexual difference in territorial defence, a  
156 recent study reported that male horneros engaged more in defending their territories than  
157 females (Diniz et al. 2018). Further, because in horneros territory take-over is expected to be a  
158 stronger driver of aggression than paternity loss (i.e. extra-pair paternity levels are ~ 3%;  
159 Diniz et al. 2019), we predicted higher levels of territory defence earlier in the nest building  
160 than in the provisioning context (see also Demko and Mennill 2018). Finally, we predicted  
161 both members of the pair to positively correlate their territory defence behaviors (e.g. Diniz et  
162 al. 2020).

163

## 164 **Materials and Methods**

### 165 **Field site and experimental procedures**

166 We studied pairs of horneros in two periods during 2016 on the campus of INIA “Las Brujas”  
167 (National Institute of Agricultural Research), department of Canelones, Uruguay (34°40’ S,  
168 56°20’ W; 0-35 m a.s.l.). Behavioural assays were carried out during “nest-building” (i.e.  
169 when pairs were observed finishing their nests and females were in their fertile period; August  
170 23<sup>rd</sup> – September 27<sup>th</sup>), and “provisioning” periods (i.e. when pairs were observed feeding  
171 their young; November 7<sup>th</sup> – December 6<sup>th</sup>). Overall, we observed 39 males and 38 females  
172 during nest building and 25 males and 24 females during provisioning. Each pair was tested  
173 only one time (i.e. either during the nest-building or during the provisioning period). It was  
174 not possible to record data blind because our study involved focal animals in the field. All the  
175 behavioural assays were performed between 07h00 and 13h00. We quantified territorial  
176 defence behaviours by performing simulated territorial intrusions (STI) in the territory of a  
177 focal pair. Once the focal pair was identified, a stuffed decoy of a hornero together with  
178 playback sounds was presented 10 metres away from the pair’s nest. Using two decoys could  
179 have been more realistic; however, we could not do this for ethical reasons. Every STI  
180 playback lasted 20 minutes and consisted of randomly selected stimuli from a pool of ten  
181 male solo songs, ten duets and ten audio files containing 7-15 seconds of silence. The  
182 auditory stimuli for each STI were randomly selected to avoid pseudo-replication of the  
183 acoustic component across territories (e.g. Apfelbeck et al. 2011), to avoid a behavioural bias  
184 towards specific songs or duets, and to elicit comparable behavioural responses across  
185 territories. Our approach hinged on the notion that horneros are suboscines and do not learn

186 their vocalizations (Freeman et al. 2017). This is, compared to oscines, the acoustic variability  
187 of songs and duets across individuals is low (Freeman et al. 2017). We played silence tracks  
188 of different length to avoid habituation in the focal birds. All playback sounds were “wav”  
189 files recorded in Uruguay and were obtained from the database of Xeno-canto ([www.xeno-](http://www.xeno-canto.org)  
190 [canto.org](http://www.xeno-canto.org)) and normalized in amplitude. All the sounds were broadcasted from a single  
191 speaker (Douglas and Mennil 2010). Although a multiple-speaker approach would have been  
192 more realistic, because horneros frequently perform their duets while close to each other, it is  
193 unlikely that our set-up introduced a bias in the STIs. We simultaneously recorded the  
194 behaviour of each individual of the pair during the 20 minutes of STI (mean  $\pm$  SE; 19.96  $\pm$   
195 0.23 min). Two observers performed the observations from a distance of 15 metres using  
196 digital voice recorders (Philips VoiceTraicer DVT1200 and Olympus Digital Recorder VN-  
197 733 PC). The focal bird was randomly assigned to each observer. The following measures  
198 were recorded: 1) response latency (time between start of playback and first approach within  
199 10 metres from the dummy), 2) time spent within five metres of the decoy, 3) average time  
200 spent on the nest during a visit, 4) number of solo songs, 5) number of duet songs, and 6)  
201 number of flights over the decoy (i.e. flights directed to and over the decoy). Regarding the  
202 variable ‘number of duets’, we initially considered the fact that both males and females can  
203 initiate the duet (Diniz et al, 2018). However, during our STIs there were seldom cases in  
204 which the female initiated the duet, and none were during nest building. For this reason, we  
205 only considered the number of duets as a joint variable across sexes in our models.  
206 Additionally, the solo songs in males represent instances in which females decided not to join  
207 in the duet. The sex of each bird could be determined from the acoustic signature of each  
208 individual because the vocal contribution of each sex in the duet is dimorphic (Roper 2005).  
209 As part of a different project, birds were captured after the STI and the sex was verified by  
210 PCR (sex was correctly assigned by the observers in 96.3% of the cases for those individuals  
211 to whom the sex could be assigned acoustically and were trapped in the nets; for details see  
212 Adreani et al. 2018).

213

## 214 **Statistical analyses**

### 215 *(i) Structural equation modelling*

216 First, we applied a structural equation modelling (SEM) approach to study three *a priori*  
217 hypotheses of relationships among the six behavioural variables quantified during the  
218 simulated territorial intrusion (i.e. response latency, time spent within five metres of the  
219 decoy, time spent on the nest, number of solo songs, number of duet songs, and number of

220 flights over the decoy; Fig. 1). Of the three models for each sex and context, model 1  
221 represents a (biologically unrealistic) “null” expectation (i.e. each defensive behaviour is  
222 independent and not part of a functional unit or evolutionary character); model 2 hypothesises  
223 that one latent variable, “territorial defence”, underlies the relationships between the six  
224 behavioural variables; and model 3 hypothesises that all behavioural variables except number  
225 of duet songs are linked by the latent variable “territorial defence”. While more complex  
226 structural models could be constructed (i.e. including trade-offs between behavioural  
227 variables), the present framework is the one that allows for a straightforward testing the “joint  
228 territorial defence” hypothesis (Hall 2009). We estimated each structural equation model  
229 separately for males and females because we only have one measure of the number of duet  
230 songs from a single pair and, therefore, it is not possible to disentangle the sex-differences in  
231 number of duets on the latent variable territorial defence. We also estimated each model  
232 separately for the two breeding contexts (i.e. nest building *vs.* provision context). The  
233 formulation of these four different sets of models allowed us to qualitatively assess whether  
234 there were differences between sexes and breeding contexts (nest building and provisioning)  
235 in the structure and strength of the hypothesized latent variable. Therefore, besides  
236 characterizing the latent variable structure, we were also interested in qualitatively  
237 investigating differences between sexes and contexts in path loadings across models (i.e.  
238 whether behavioural traits maintain their rank differences among path loadings). We also  
239 constructed a single model for each sex in both breeding contexts, where the 12 different  
240 behavioural variables were modelled simultaneously. However, we decided to present here  
241 the separated models, one for each breeding context, because the full model (i.e., with the 12  
242 variables) is likely over-parametrized (i.e., there was a compromise between the complexity  
243 of the SEM models fitted and the number of observations given the number of variables tested  
244 in each SEM). See Supplementary Material for further details on the full model (Table S1-2  
245 and Fig S1).

246 To test the relative fit of each alternative biological hypotheses, we first estimated the  
247 matrix of phenotypic correlations of all the behavioural variables for each combination of sex  
248 and breeding context. The correlation matrix was constructed using Spearman coefficients  
249 obtained with the R package “stats” in R v. 3.3.3 (R Core Team 2013). Data on “response  
250 latency” were missing for one out of 38 individual females during nest building and data for  
251 “time spent on the nest” were missing for two out of 24 females during provisioning. We  
252 assigned the average population phenotypic value of each trait to those individuals with  
253 missing values (note that a “complete-case analysis” did not change our findings, results not



254 shown). We then implemented each among-trait correlation matrix in the R-package “sem”  
255 and tested the different SEM hypotheses. We statistically compared each model’s fit using the  
256 Akaike Information Criterion for small sample sizes (AICc; Burnham and Anderson 2004)  
257 and evaluated their relative support based on AICc differences relative to the best-fitting  
258 model ( $\Delta\text{AICc}$ ). We also present values for the Goodness of Fit Index (GFI), which represents  
259 the proportion in the improvement of the overall fit of a given hypothesised model compared  
260 to the independence model. GFI values range from 0 (poor fit) to 1 (perfect fit), being  
261 considered as satisfactory when it is higher than 0.9.

262

263 *(ii) Univariate mixed-effect models*

264 As a second step, we investigated sources of variation in territorial defence behaviour in our  
265 population of horneros using a series of univariate mixed models. This step was necessary  
266 because we were also interested in investigating sex-differences in territorial defence.  
267 However, as we only had a single measure of number of duets per pair, we could not test for  
268 sources of variation in territorial defence using our multivariate SEM approach. Thus, we ran  
269 two univariate mixed-effect models fitting number of flights over the decoy and number of  
270 duets as the response variables, respectively. Though we had measured various potential  
271 proxies of territorial defence (detailed above), we used number of flights over decoy and  
272 number of duet songs because they consistently had the highest value in path loading across  
273 all models (for a further discussion on the rationale of this approach, see Araya-Ajoy and  
274 Dingemanse 2013). Breeding context (nest building vs. provisioning), sex (male vs. female)  
275 and their interaction, time of the day (i.e. moment of the day when the territorial intrusion was  
276 simulated, expressed in decimal fractions of hours after sunrise and mean centred), and  
277 observer identity (observer 1 vs. 2) were included as fixed effects in the univariate mixed-  
278 effect models. Time of day was mean centred, such that the fixed-effect intercept of the model  
279 was estimated for the behavioural trait on the average time (following Dingemanse and  
280 Dochtermann 2013). In the model with “number of flights over the decoy” as a response  
281 variable, we fitted random intercepts for pair identity (“Pair identity”;  $n = 63$  levels). In the  
282 model with “number of duet songs”, we did not include this random effect because we did not  
283 have repeated measures of duet song frequency for the same pair identity. Both response  
284 variables, number of flights over the decoy and number of duet songs, were modelled with  
285 Poisson errors with a log-link function. In both models, we included an observation level  
286 random effect to account for over-dispersion (Harrison 2014). The analyses were performed  
287 using the R packages “lme4” (Bates et al. 2014) and “arm” (Gelman and Yu-Sung 2015). We

288 used the “sim” R function to simulate posterior distributions of the model parameters. Based  
289 on 5000 simulations, we extracted the mean value and 95% Credible Intervals (CrI) of the  
290 posterior distributions. Model fit was assessed by visual inspection of the residuals.  
291 Assessment of statistical support was obtained from the posterior distribution of each  
292 parameter (Zuur 2016). We considered an effect “strongly supported” if zero was not included  
293 within the 95% CI, and “moderately supported” if the point estimate was skewed away from  
294 zero while its 95% CI simultaneously overlapped zero. Estimates centred on zero were  
295 viewed as strong support for the absence of an effect.

296

### 297 *(iii) Correlation between male and female contribution to territorial defence*

298 We studied the correlation pattern between male and female territorial defence to investigate  
299 whether defence response within a pair was positively correlated. To do so, we estimated the  
300 Spearman correlation coefficient of “number of flights over the decoy” between males and  
301 females from a single pair. This correlation was calculated by including in our analysis all  
302 pairs observed during both contexts ( $n = 91$  pairs), given that we found no differences in the  
303 number of flights over the decoy between the nest building and provisioning contexts (see  
304 below). The correlation test was performed using the R-package “stats” in R v. 3.3.3 (R Core  
305 Team 2013).

306

## 307 **Results**

### 308 (i) Territorial defence as a latent trait and the role of duetting

309 The behavioural variables assayed during the simulated territorial intrusion (i.e. response  
310 latency, time spent within five metres of the decoy, time spent on the nest, number of solo  
311 songs, number of duet songs, and number of flights over the decoy) were, to a varying extent,  
312 correlated with each other; both across sexes and contexts (Table S3, S4). Overall, horneros  
313 with shorter latency of response to the territorial intrusion spent more time within five metres  
314 of the decoy and on the nest, sang more solo and duet songs, and flew more often over the  
315 decoy, suggesting the existence of the hypothesised latent variable “territorial defence”  
316 linking the six behavioural variables.

317 AICc model comparison identified the SEM model 2 as the best one (among the  
318 models we fitted) explaining the structure of the phenotypic variables across the four different  
319 set of models (Table 1). Model 2 represented an overarching latent variable (“territorial  
320 defence”) linking the expression of all behavioural variables, including the number of duet  
321 songs (Fig. 1A). Furthermore, the number of duet songs together with the number of flights

322 over the decoy had consistently the highest values of path loading in males and females for  
323 both breeding context (Fig. 1B, Table S5). We thus considered them both equally good  
324 predictors for territory defence in horneros. Furthermore, a standard index of model fit  
325 ("Goodness of Fit Index") considered satisfactory our best fitting model across all models  
326 (i.e., GFI values for Model 2 were around or above 0.90 across all models, Table 1).

327

328 *(ii) Effect of sex, breeding context and time of the day on territorial defence*

329 We did not find strong evidence that horneros differed in the number of duet songs between  
330 the nest building and provisioning context. While the effect size is moderately supported, the  
331 evidence is weak due to large uncertainty (Table 2; Fig. 2A). We did not find differences in  
332 the number of duets explained by time of the day (Table 2). Regarding the number of flights  
333 over the decoy, males were on average defending more (i.e. flew more times over the decoy)  
334 than females during both breeding contexts (Table 2; Fig. 2B). However, we again found  
335 weak evidence that horneros differed in the number of flights over the decoy between the nest  
336 building and provisioning context, and there were also no sex-specific differences between  
337 the two breeding contexts (i.e. the effect sizes are relatively large but estimated with large  
338 uncertainty, therefore the support is moderate; Table 2, Fig. 2B). Furthermore, we observed  
339 moderate effects of time of day and observer identity in our model (the estimates include zero  
340 in their 95% CrI, but the effect sizes are considerable).

341

342 *(iii) Defending as a unit: correlation between male and female territorial defence*

343 We investigated whether the defensive response to a territory intrusion of an individual was  
344 correlated with the response expressed by its partner. We found that territorial defence of  
345 males and females within pairs was strongly positively correlated ( $\rho = 0.67$ ,  $p < 0.0001$ ).  
346 Thereby, within a single pair, male and female had matching levels of defensive response  
347 (Fig. 3).

348

349 **Discussion**

350 We studied territorial defence in both male and female horneros and the role of duets during  
351 nest building and provisioning contexts. By using structural equation modelling, we were able  
352 to demonstrate that six observed behavioural variables (i.e. response latency, time spent  
353 within five metres of the decoy, average time spent on the nest during a visit, number of solo  
354 songs, number of duet songs, and number of flights over the decoy) were linked by an  
355 unmeasured latent trait "territorial defence", both across sexes and contexts (Fig. 1). We also

356 found that the number of flights over the decoy and duet songs were the variables with highest  
357 path loading to territorial defence. We then proceed to study independently those two traits  
358 with highest path loadings and showed that males were defending territories more strongly  
359 than were females during both breeding contexts, even though we only found weak evidence  
360 for differences between contexts within each sex (owing to large uncertainty in our estimate,  
361 Fig. 2). Lastly and as expected, we observed a strong positive correlation in territorial defence  
362 between males and females within the pair (Fig. 3).

363         The correlation structure of the latent variable territorial defence was similar in males  
364 and females, providing for the first time a sex-comparison of the latent variable “territorial  
365 defence” in birds. We also observed that the sign and magnitude of the path loadings between  
366 breeding contexts (i.e. nest building and provisioning) were very similar (Fig. 1B). Our results  
367 thus suggest the existence of a common structure in defensive behaviour during territorial  
368 intrusion in horneros, potentially underlined by a sex- and context-independent mechanism  
369 that is affecting all behavioural variables in a similar manner. However, to draw general  
370 evolutionary patterns of territorial defence it would be necessary to investigate whether the  
371 described latent variable is under selection as an integrated trait (i.e. functional module) and  
372 whether the same structure among traits is observed in other life-history stages (e.g. outside  
373 the breeding season) or in different ecological contexts (e.g. as territorial defence against  
374 predators or nest-parasitic species). Importantly, by using a structural equation modelling  
375 approach we were able to reveal complex relationships for multiple traits that would have  
376 otherwise not been possible to capture. Traditional statistical approaches such as multiple  
377 regression analysis or principal component analysis (PCA) are not suitable to evaluate  
378 different *a priori* defined hypotheses while accounting for trait correlation. PCAs are defined  
379 purely on the basis of mathematical associations between the traits and so their biological  
380 meaning can be challenging to interpret or even nonexistent. However, SEM provides a more  
381 interpretable method of viewing variation among correlated variables. Although SEM will  
382 ultimately be defined by mathematical associations like PCAs, with SEM, one makes use of  
383 biological information to fit the correlation structure to be tested among variables. Therefore,  
384 SEM has a clear advantage over PCA in terms of making biological inferences from the data.  
385 Lastly, another advantage of using a structural equation modelling approach is related to data  
386 collection methods. The fact that the number of flights over the decoy and duets songs were  
387 the variables with the highest path loadings to territorial defence indicates that by measuring  
388 only these two observable behaviours, and not all six, researchers should have a good  
389 estimation of territorial defence – at least in those studies that aim to quantify territorial

390 defence towards conspecifics in horneros. Nonetheless, a good biological use of the approach  
391 would require a validation of the method for each new species where territorial defence is to  
392 be characterized.

393 In the context of territorial defence, duets have been mostly studied as a single trait  
394 independently of other complementary or related behaviours in multiple bird species (e.g.  
395 Hall and Peters 2008; Dowling and Webster 2016; Odom et al. 2017; Quirós-Guerrero et al.  
396 2017). Here we explicitly tested for the first time whether duets are a behavioural variable  
397 linked by a latent trait, “territorial defence”. We did so by combining a classical STI approach  
398 with structural equation modelling. One of the predictions of the “joint territorial defence”  
399 hypothesis is that duets should play a more important role than solo songs (Hall 2009). As  
400 expected, in our study duets represented an important response during territorial defence for  
401 both sexes and breeding contexts. They were stronger than solo songs and were as relevant as  
402 other physical traits like the number of flights over the decoy. Our results are in line with  
403 previous findings in the species suggesting the territorial function of duets in hornero, overall  
404 providing evidence for the “joint territorial defence” hypothesis (Diniz et al. 2018, 2019,  
405 2020). While previous studies tested this hypothesis by means of different approaches, the  
406 strength of our study resides in the application of a comprehensive method that accounts for  
407 the multivariate nature of territorial defence behaviours.

408 Males defended more their territories than females during both breeding contexts. At  
409 first glance, this is not surprising given that an unequal sex contribution of territorial defence  
410 has been previously reported in bird species that are socially monogamous and maintain  
411 territories year round (e.g. Willis 1972; Morton and Derrickson 1996; Bard et al. 2002; Fedy  
412 and Stutchbury 2005; Quinard and Cézilly 2012). In the specific case of horneros, however,  
413 male and female have been reported to contribute equally in most of the behaviours studied to  
414 date (Fraga 1980; Massoni et al. 2012; Diniz et al. 2020). However, there is strong evidence  
415 for sexual differences in singing-related traits independent of season (Diniz et al. 2018).  
416 Additionally, the observation that males engaged more in aggressive interactions than females  
417 has only been recently described (Diniz et al. 2018). Thus, our findings confirm and expand  
418 this observation with a standardized field test applied to a multivariate framework beyond  
419 song production. One explanation for the observed sex-differences might be a division of  
420 labour between members of a pair (e.g. Morton et al. 2000). For instance, males might invest  
421 more resources (i.e., time and energy) in actively defending their territory or nest (e.g.  
422 physical attacking the intruder), whereas females might focus on different activities (e.g.  
423 predator vigilance, guarding the nest against parasitic species). Another factor potentially

424 explaining our results is that males and females might face different physiological (breeding)  
425 costs (e.g. Nilsson and Råberg 2001). In fact, during nest building (when females are close to  
426 egg laying) females have a poorer oxidative condition than males and are more sensitive to  
427 STIs, suggesting a sex-specific physiological cost of territorial defence (Mentesana and  
428 Adreani 2020). Lastly, our findings could also be influenced by the way the territorial  
429 intrusions were performed (i.e. with one single dummy). While plausible, this explanation  
430 seems unlikely given that horneros are monomorphic in body size and plumage colouration  
431 (Diniz et al. 2016) and the playbacks consisted of vocalizations from both sexes.

432 We did not find strong support for our prediction that the levels of territorial defence  
433 were higher during the nest building than in the provisioning context (Table 2). Given that  
434 extra-pair levels are very low in this species (~3%, Diniz et al. 2019), one of the main  
435 assumptions of our prediction was that territory take-over was higher during the fertile period  
436 of the females, i.e., during nest building than during provisioning (Gill et al. 2007; Demko  
437 and Mennill 2018). It is possible that for horneros it is more beneficial to maintain constant  
438 levels of territorial defence in order to hold the territory year-round than the potential benefits  
439 of extra-pair paternity (Warner and Hoffman 1980). This might be especially the case when  
440 population densities are high, where comparable territorial defence can be expected across  
441 different life-stages as we observed in the horneros. Further research will help to shed light on  
442 these context-specific patterns.

443 Male and female aggression were strongly and positively correlated within the pair  
444 despite sex-specific differences in territorial defence. Our results are in line with previous  
445 findings of coordinated territorial defense on rufous horneros outside the breeding season  
446 (Diniz et al. 2020) and more generally with other studies showing that duetting birds were  
447 more collaborative within the pair than non-duetting species (see Logue 2005). Although our  
448 study cannot directly address the evolutionary relevance of pairs being positively correlated in  
449 their behaviours (e.g., fitness consequences), our findings suggest that exhibiting a joint  
450 territorial defence might be an important mechanism of pair bonding or pair stability (Wickler  
451 and Seibt 1980). In this direction, our study raises the question of whether pairs of horneros  
452 that show similar territorial defence levels would experience increased reproductive benefits  
453 (Schuett et al. 2010). Indeed, it is known from other bird species that pairs exhibiting  
454 comparably high levels of territory defence towards conspecifics attain higher reproductive  
455 success (e.g. in eastern blue birds, *Sialia sialis*; Harris and Siefferman 2014). Therefore,  
456 investigating patterns of selection on assortative mating in pairs of horneros poses an exciting  
457 avenue for future research.

458

459 **Conclusion**

460 This work expands upon a classical body of research on territorial defence. We demonstrated  
461 that six observed behavioural variables quantified during a simulated territorial intrusion were  
462 linked by an unmeasured latent trait “territorial defence”. In particular, the number of flights  
463 over the decoy and the number of duet songs were the variables with highest path loadings to  
464 the latent variable “territorial defence”. Furthermore, this study fills an important gap in our  
465 knowledge about the role of duets. We provided support for the hypothesis that avian duets  
466 are a key component in the joint territory defence. Indeed, we showed that duets represented a  
467 stronger response of territory defence than solo songs, and that their importance was  
468 comparable to physical traits. Our study also highlights the importance of using more  
469 integrative, multivariate approaches to study behavioural traits. By applying a structural  
470 equation modelling framework, we were able to evaluate *a priori* hypotheses of how different  
471 behavioural variables were linked by an unmeasured latent trait. Such complex patterns would  
472 have not been possible to capture using traditional statistical approaches such as principal  
473 component analyses. Hence, the combination of a classical behavioural approach like  
474 simulated territorial intrusions with structural equation modelling brings new exciting  
475 possibilities into the field of behavioural ecology.

476

477 **Authors' contributions**

478 NMA, LM and MM share first authorship and names are ordered at random. NMA and LM  
479 conceived the study and designed the study. BT provided logistic support. NMA, LM, EG and  
480 EC collected the data. NMA, LM, and MM analyzed the data. NMA, LM, and MM wrote the  
481 manuscript with input from all authors.

482

483 **Acknowledgments**

484 We thank Klaus Pichler for his help to prepare the STI and all the “INIA Las Brujas” staff for  
485 supporting us with accommodation and equipment during fieldwork. We also thank Facultad  
486 de Ciencias and the Ethology lab from Universidad de la República and Juan Carlos Reboreda  
487 and the “Laboratorio de Ecología y Comportamiento Animal” at the Universidad de Buenos  
488 Aires for the logistical support, and Pablo Tubaro from the Museo Argentino de Ciencias  
489 Naturales ‘Bernardino Rivadavia’ (MACN) for providing us with the mounted hornero. We  
490 are grateful to Manfred Gahr and Michaela Hau for their valuable support. We also thank  
491 Yimen Araya-Ajoy, Glenn Cockburn, Luke Eberhart-Phillips and Wolfgang Wickler for  
492 constructive criticism on previous versions of the manuscript. Finally we want to thank the  
493 anonymous reviewers for constructive feedback on the manuscript.

494

495 **Availability of data**

496 The datasets generated and/or analysed during the current study are available in the open  
497 repository: Mendeley Data ([LINK](#)).

498

499 **Compliance with ethical standards**

500 **Ethical approval**

501 The experimental procedures of this study have approval by the Ethics Committee of Animal  
502 Experimentation (CEUA) of the Facultad de Ciencias of the Universidad de la República,  
503 Uruguay (Protocol number 186, file 2400-11000090-16).

504 **Conflict of interest**

505 The authors declare they have no conflicts of interest.

506 **Funding**

507 This work was funded by the International Max Planck Research School (IMPRS) for  
508 Organismal Biology, and by Idea Wild that provided field equipment.

509

510



511 **References**

512 Adreani NM, Goymann W, Montesana L (2018) Not one hormone or another: Aggression  
513 differentially affects progesterone and testosterone in a South American ovenbird. *Horm*  
514 *Behav* 105:104–109

515

516 Apfelbeck B, Goymann W (2011) Ignoring the challenge? Male black redstarts (*Phoenicurus*  
517 *ochruros*) do not increase testosterone levels during territorial conflicts but they do so in  
518 response to gonadotropin-releasing hormone. *Proc R Soc Lond B* 278:3233–3242

519

520 Araya-Ajoy YG, Dingemanse NJ (2013) Characterizing behavioural “characters”: an  
521 evolutionary framework. *Proc R Soc B* 281:20132645

522

523 Bard SC, Hau M, Wikelski M, Wingfield JC (2002) Vocal distinctiveness and response to  
524 conspecific playback in the spotted antbird, a neotropical suboscine. *Condor* 104:387-394

525

526 Bates D, Mächler M, Bolker B, Walker S (2014) Fitting linear Mixed-Effects Models using  
527 lme4, <https://cran.r-project.org/web/packages/lme4/index.html>

528

529 Bollen KA (2002) Latent variables in psychology and the social sciences. *Annu Rev Psychol*  
530 53:605–634

531

532 Burnham KP, Anderson DR (2004) Multimodel inference. *Sociol Methods Res* 33:261–304

533

534 Carter AJ, Feeney WE (2012) Taking a comparative approach: Analysing personality as a  
535 multivariate behavioural response across species. *PLoS ONE* 7:e42440

536

537 Card NA, Little TD (2007) Studying aggression with structural equation modeling. In:  
538 Flannery DJ, Vazsonyi AT, Waldman ID (eds) *The Cambridge handbook of violent behavior*  
539 *and aggression*. Cambridge University Press New York, NY, pp 727-739

540

541 Clutton-Brock TH, Vincent ACJ (1991) Sexual selection and the potential reproductive rates  
542 of males and females. *Nature* 351:58–60

543

544 Demko AD, Mennill DJ (2018) Male and female signaling behavior varies seasonally during

- 545 territorial interactions in a tropical songbird. *Behav Ecol Sociobiol* 72:84  
546
- 547 Dingemans NJ, Dochtermann NA (2013) Quantifying individual variation in behaviour:  
548 mixed-effect modelling approaches. *J Anim Ecol* 82:39–54  
549
- 550 Diniz P, Júnior EF da S, Webster MS, Macedo RH (2018) Duetting behavior in a Neotropical  
551 ovenbird: sexual and seasonal variation and adaptive signaling functions. *J Avian Biol* 49:jav-  
552 01637  
553
- 554 Diniz P, Macedo RH, Webster MS (2019) Duetting correlates with territory quality and  
555 reproductive success in a suboscine bird with low extra-pair paternity. *Auk* 136:1-13  
556
- 557 Diniz P, Rech G, Ribeiro PH, Webster MS, Macedo RH (2020) Partners coordinate territorial  
558 defence against simulated intruders in a duetting ovenbird. *Ecol Evol* 10:81-89  
559
- 560 Diniz P, Ribeiro PHL, Rech GS, Macedo RH (2016) Monochromatism, cryptic sexual  
561 dimorphism and lack of assortative mating in the Rufous Hornero, *Furnarius rufus*  
562 *albobularis*. *Emu* 116:294–300  
563
- 564 Dowling J, Webster MS (2016) An experimental test of duet function in a fairy-wren  
565 (*Malurus*) with moderate cuckoldry rates. *Behav Ecol* 27:228–236  
566
- 567 Emlen ST, Oring LW (1977) Ecology, sexual selection, and the evolution of mating systems.  
568 *Science* 197:215–223  
569
- 570 Farabaugh SM (1982) The ecological and social significance of duetting.  
571 In: Kroodsma DE, Miller EH (eds) *Acoustic Communication in Birds*, vol. 2. Academic  
572 Press, New York, pp 85–124  
573
- 574 Fedy BC, Stutchbury BJM (2005) Territory defence in tropical birds: are females as  
575 aggressive as males? *Behav Ecol Sociobiol* 58:414–422  
576
- 577 Fraga RM (1980) The breeding of Rufous Horneros (*Furnarius rufus*). *Condor* 82:58–68  
578

- 579 Freeman BG, Montgomery GA, Schluter D (2017) Evolution and plasticity: Divergence of  
580 song discrimination is faster in birds with innate song than in song learners in Neotropical  
581 passerine birds. *Evolution* 71:2230-2242  
582
- 583 Garcia JT, Arroyo BE (2002) Intra- and interspecific agonistic behaviour in sympatric harriers  
584 during the breeding season. *Anim Behav* 64:77-84  
585
- 586 Gelman A, Yu-Sung S (2015) arm: Data analysis using regression and multilevel/hierarchical  
587 models. R package version 1.8-5, <https://cran.r-project.org/web/packages/arm/arm.pdf>  
588
- 589 Gill SA, Alfson ED, Hau M (2007) Context matters: female aggression and testosterone in a  
590 year-round territorial neotropical songbird (*Thyrothorus leucotis*). *Proc R Soc Lond B*  
591 274:2187-2194  
592
- 593 Greenberg R, Gradwohl J (1983) Sexual roles in the dot-winged antwren (*Microrhopias*  
594 *quixensis*), a tropical forest passerine. *Auk* 100:920-925  
595
- 596 Hall ML (2004) A review of hypotheses for the functions of avian duetting. *Behav Ecol*  
597 *Sociobiol* 55:415-430  
598
- 599 Hall ML (2009) A review of vocal duetting in birds. *Adv Stud Behav* 40:67-121  
600
- 601 Hall ML, Peters A (2008) Coordination between the sexes for territorial defence in a duetting  
602 faire-wren. *Anim Behav* 76:65-73  
603
- 604 Harris MR, Siefferman L (2014) Interspecific competition influences fitness benefits of  
605 assortative mating for territorial aggression in eastern bluebirds (*Sialia sialis*). *PLoS ONE*  
606 9:e88668  
607
- 608 Harrison XA (2009) Using observation-level random effects to model overdispersion in count  
609 data in ecology and evolution. *PeerJ* 2:e616  
610
- 611 Houle D, Pélabon C, Wagner GP, Hansen TF (2011) Measurement and meaning in biology. *Q*  
612 *Rev Biol* 86:3-34

613

614 Huntingford FA (1976) An investigation of the territorial behaviour of the three-spined  
615 stickleback (*Gasterosteus aculeatus*) using principal components analysis. Anim  
616 Behav 24:822-834

617

618 Koloff J, Mennill DJ (2013) The responses of duetting antbirds to stereo duet playback  
619 provide support for the joint territory defence hypothesis. Ethology 119:462–471

620

621 Korner-Nievergelt F, Roth T, von Felten S, Guélat J, Almasi B, Korner-Nievergelt P (2015)  
622 Bayesian data analysis in ecology using linear models with R, BUGS, and Stan. Academic  
623 Press, New York

624

625 Langmore NE (1998) Functions of duet and solo songs of female birds. Trends Ecol Evol  
626 13:136–140

627

628 Massoni V, Reboreda JC, López GC, Aldatz MF (2012) High coordination and equitable  
629 parental effort in the Rufous Hornero. Condor 114:564–570

630

631 Montesana L, Adreani NM (2020) Is aggression costly? Acute aggressive behavior increases  
632 oxidative stress independently of testosterone. bioRxiv,  
633 <https://doi.org/10.1101/2020.04.06.027029>

634

635 Morton ES, Derrickson KC (1996) Song ranging by the dusky antbird, *Cercomacra*  
636 *tyrannina*: ranging without song learning. Behav Ecol Sociobiol 39:195–201

637

638 Morton ES, Derrickson KC, Stutchbury BJM (2000) Territory switching behavior in a  
639 sedentary tropical passerine, the dusky antbird (*Cercomacra tyrannina*). Behav Ecol 11:648–  
640 653

641

642 Naguib M, Mennill DJ (2010) The signal value of birdsong: empirical evidence suggests song  
643 overlapping is a signal. Anim Behav 80:e11-e15

644

645 Nilsson JÅ, Råberg L (2001) The resting metabolic cost of egg laying and nestling feeding in  
646 great tits. Oecologia 128:187–192

647

648 Odom KJ, Logue DM, Studds CE, Monroe MK, Campbell SK, Omland KE (2017) Duetting  
649 behavior varies with sex, season, and singing role in a tropical oriole (*Icterus icterus*). Behav  
650 Ecol 28:1256–1265

651

652 Owens IPF, Thompson DBA (1994) Sex differences, sex ratios and sex roles. Proc R Soc  
653 Lond B 258:93–99

654

655 Quinard A, Cézilly F (2012) Sex roles during conspecific territorial defence in the Zenaida  
656 dove, *Zenaida aurita*. Anim Behav 83:47–54

657

658 Quirós-Guerrero E, Janeiro MJ, Lopez-Morales M, Cresswell W, Templeton CN (2017)  
659 Riverside wren pairs jointly defend their territories against simulated intruders. Ethology  
660 123:949–956

661

662 R Core Team (2013) R: A language and environment for statistical computing. R Foundation  
663 for Statistical Computing, Vienna, Austria, <http://www.R-project.org>

664

665 Robinson A (1949) The biological significance of bird song in Australia. Emu 48:291–315

666

667 Roper JJ (2005) Sexually distinct songs in the duet of the sexually monomorphic Rufous  
668 Hornero. J Ornithol 76:234–236

669

670 Schuett W, Tregenza T, Dall SRX (2010) Sexual selection and animal personality. Biol Rev  
671 85:217–246

672

673 Searcy WA, Beecher MD (2009) Song as an aggressive signal in songbirds. Anim  
674 Behav 78:1281–1292

675

676 Smith BR, Blumstein DT (2008) Fitness consequences of personality: a meta-analysis. Behav  
677 Ecol 19:448–455

678

679 Sosa-López JR, Mennill DJ, Renton K (2017) Sexual differentiation and seasonal variation in  
680 response to conspecific and heterospecific acoustic signals. Ethology 123:460–466

681

682 Sprenger D, Dingemanse NJ, Dochtermann NA, Theobald J, Walker SP (2012) Aggressive  
683 females become aggressive males in a sex-changing reef fish. *Ecol Lett* 15:986-992

684

685 Stamps JA, Krishnan VV (1997) Functions of fights in territory establishment. *Am Nat*  
686 150:393–405

687

688 Tobias JA, Sheard C, Seddon N, Meade A, Cotton AJ, Nakagawa S (2016) Territoriality,  
689 social bonds, and the evolution of communal signaling in birds. *Front Ecol Evol* 4:74

690

691 Topp SM, Mennill DJ (2008) Seasonal variation in the duetting behaviour of rufous-and-  
692 white wrens (*Thryothorus rufalbus*). *Behav Ecol. Sociobiol* 62:1107–1117

693

694 Warner RR, Hoffman SG (1980) Population density and the economics of territorial defence  
695 in a coral reef fish. *Ecology* 61:772–780

696

697 Wickler W, Seibt U (1980) Vocal duetting and the pair bond. *Z Tierpsychol* 52:217–226

698

699 Willis EO (1972) The Behavior of ocellated antbirds. *Ornithol Monogr* 10:1–162

700

701 Wingfield JC (1994) Regulation of territorial behavior in the sedentary song sparrow,  
702 *Melospiza melodia morphna*. *Horm Behav* 28:1–15

703 **Table and Figure captions**

704

705 **Table 1** Results of model comparison using Akaike Information Criterion for small sample  
706 sizes (AICc) values to compare our three candidate models. Smaller AICc values are given to  
707 models that better fit the data. Models whose AICc values differ from that of the top model  
708 ( $\Delta$ AICc) by more than 2 are considered to lack explanatory power relative to the top model.  
709 We also present values for the Goodness of Fit Index (GFI). The best-supported hypothesis is  
710 printed in boldface

711

712 **Table 2** Sources of variation in “number of flights over the decoy” and “number of duets” in  
713 horneros. Breeding context (nest building vs provisioning), sex (female vs male) and their  
714 interaction; time of the day (hours after sunrise, mean centred); and observer identity  
715 (Observer 1 vs 2) were fitted as fixed effects. Pair identity and an observation-level parameter  
716 were fitted as random effects. Both response variables were modelled with Poisson error. We  
717 present estimates of fixed ( $\beta$ ) and random ( $\sigma^2$ ) parameters with their 95% Credible Intervals  
718 (CrI) in brackets. The reference category for the categorical variable sex is “female”; for  
719 breeding context, “nest building”; and for observer identity is “observer 1”

720

721 **Fig. 1** (A) Three models (hypotheses) explaining the correlation structure among behavioural  
722 variables assayed during a simulated territory intrusion in the nest building and provisioning  
723 context in wild horneros. Model 1 hypothesises trait independence (null model); model 2  
724 hypothesises a latent variable (“territorial defence”) linking all behavioural variables, whereas  
725 model 3 hypothesises a latent variable (“territorial defence”) linking all behavioural variables  
726 except “number of duets”. Unidirectional arrows represent directional relationships between  
727 traits. Solid lines represent relationships present across all models; and the dashed line  
728 represents a relationship expressed in a specific model structure. Path “a” is only active in  
729 model 2. (B) Path loadings of model 2 for males and females in both breeding contexts.  
730 Squares and circles represent the estimated mean, and error bars represent the standard error  
731 of the mean

732

733 **Fig. 2** Number of (A) duets and (B) flights over decoy of hornero pairs during nest building  
734 and provisioning context. Grey symbols represent raw data. The mean estimates of the  
735 posterior distributions (black symbols) as well as the 95% credible intervals (error bars) are  
736 also shown

737

738 **Fig. 3** Female-male correlation of territorial defence, using number of flights over the decoy

739 as proxy. The black line represents the regression line and the dashed line is the reference line

740 with a slope of 1



741 **Figures and Tables**

742

743 **Table 1**

|                      |          |                 | <b>SEM models</b> |             |           |                |             |            |                |             |            |
|----------------------|----------|-----------------|-------------------|-------------|-----------|----------------|-------------|------------|----------------|-------------|------------|
|                      |          |                 | <b>Model 1</b>    |             |           | <b>Model 2</b> |             |            | <b>Model 3</b> |             |            |
| <b>Sex</b>           | <b>-</b> | <b>breeding</b> | <b>AIC</b>        | <b>ΔAIC</b> | <b>GF</b> | <b>AIC</b>     | <b>ΔAIC</b> | <b>GF</b>  | <b>AIC</b>     | <b>ΔAIC</b> | <b>GFI</b> |
| <b>context</b>       |          |                 | <b>c</b>          | <b>c</b>    | <b>I</b>  | <b>c</b>       | <b>c</b>    | <b>I</b>   | <b>c</b>       | <b>c</b>    |            |
| female               | -        | nest            | 72.6              | 44.53       | 0.6       | <b>28.1</b>    | <b>0.00</b> | <b>0.9</b> | 51.1           | 23.00       | 0.79       |
| building             |          |                 | 4                 |             | 0         | <b>1</b>       |             | <b>0</b>   | 1              |             |            |
| female               | -        |                 | 55.7              | 19.43       | 0.5       | <b>36.3</b>    | <b>0.00</b> | <b>0.8</b> | 54.0           | 17.75       | 0.78       |
| provisioning         |          |                 | 4                 |             | 8         | <b>1</b>       |             | <b>9</b>   | 6              |             |            |
| male - nest building |          |                 | 30.5              | 11.60       | 0.8       | <b>18.9</b>    | <b>0.00</b> | <b>0.9</b> | 30.9           | 12.06       | 0.87       |
|                      |          |                 | 3                 |             | 1         | <b>3</b>       |             | <b>5</b>   | 9              |             |            |
| male - provisioning  |          |                 | 62.1              | 16.11       | 0.5       | <b>46.0</b>    | <b>0.00</b> | <b>0.8</b> | 49.4           | 3.34        | 0.80       |
|                      |          |                 | 7                 |             | 4         | <b>6</b>       |             | <b>4</b>   | 0              |             |            |

744

745

746 **Figure 1**

747

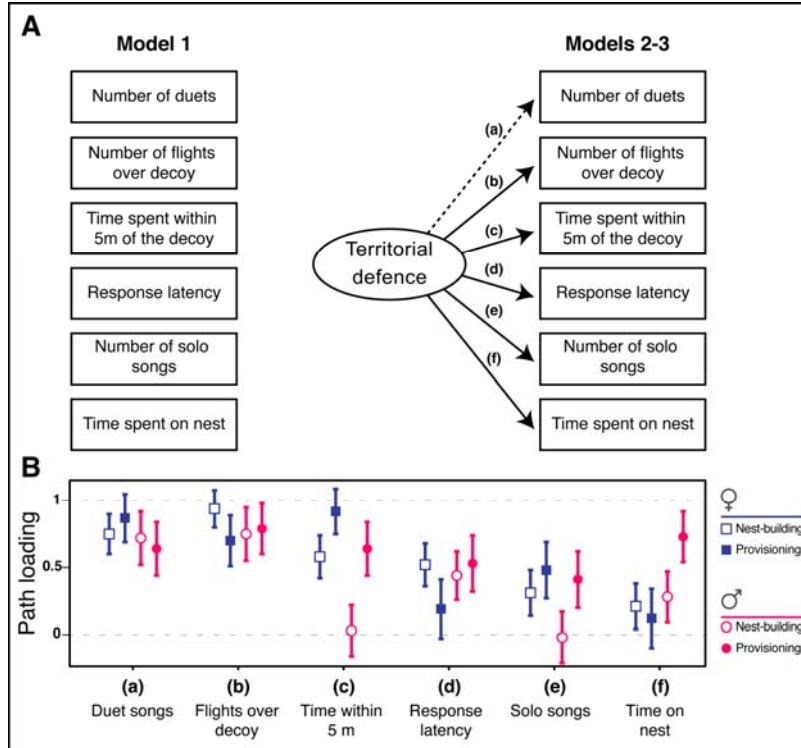

748

749

750

751

752

753 **Table 2**

|                               | <b>Flights over decoy</b>              | <b>Duets</b>                           |
|-------------------------------|----------------------------------------|----------------------------------------|
| <b>Fixed effects</b>          | <b><math>\beta</math> (95% CrI)</b>    | <b><math>\beta</math> (95% CrI)</b>    |
| Intercept                     | 2.33 (1.87, 2.78)                      | 2.44 (2.21, 2.69)                      |
| Sex                           | 0.58 (0.32, 0.83)                      | --                                     |
| Breeding context              | -0.28 (-0.88, 0.31)                    | -0.11 (-0.52, 0.28)                    |
| Sex $\times$ Breeding context | 0.22 (-0.19, 0.64)                     | --                                     |
| Time of day                   | -0.19 (-0.45, 0.05)                    | -0.07 (-0.26, 0.13)                    |
| Observer Identity             | -0.16 (-0.36, 0.04)                    | --                                     |
| <b>Random effects</b>         | <b><math>\sigma^2</math> (95% CrI)</b> | <b><math>\sigma^2</math> (95% CrI)</b> |
| Pair Identity                 | 1.02 (0.75, 1.36)                      | --                                     |

Observation-level parameter 0.18 (0.14, 0.24) 0.44 (0.33, 0.60)

754

755

756 **Figure 2**

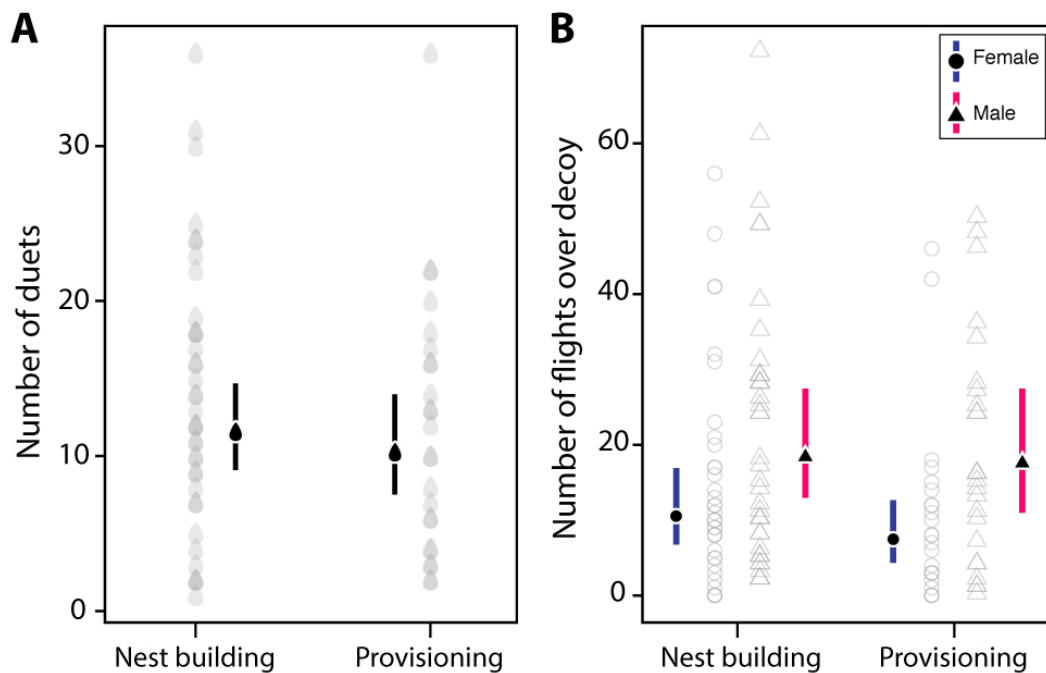

757

758

759 **Figure 3**

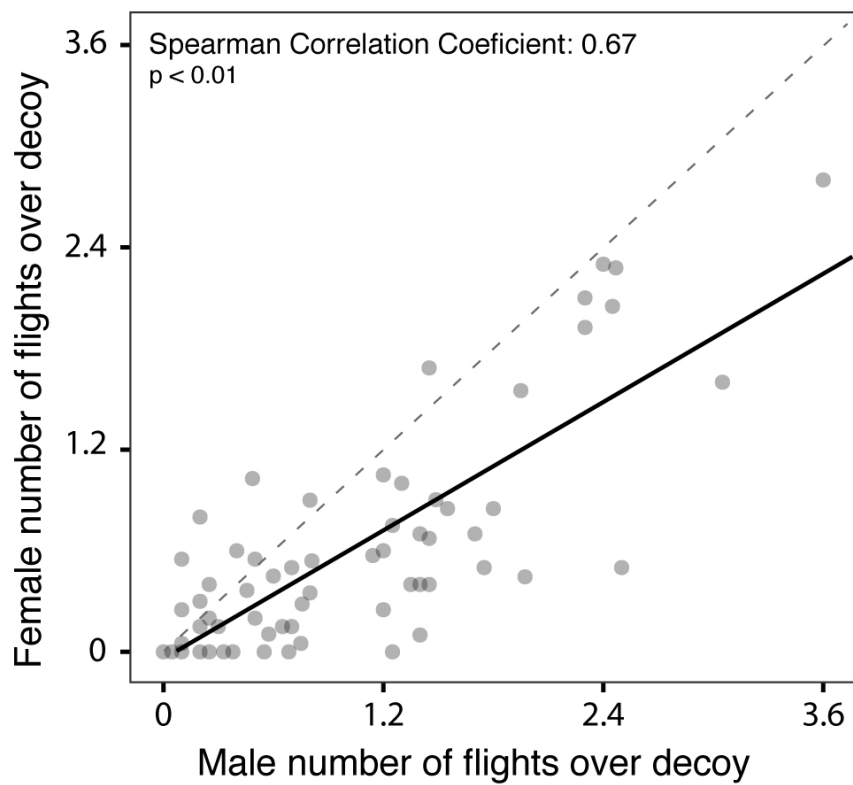

760

**A**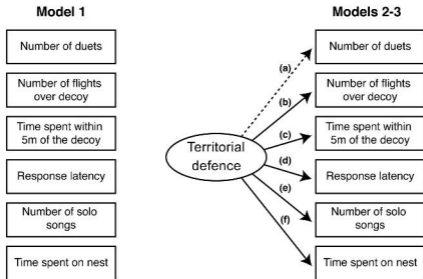**B**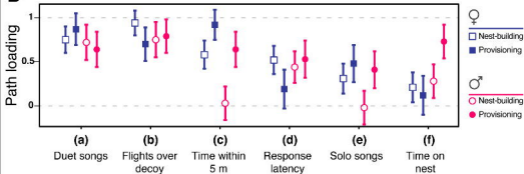

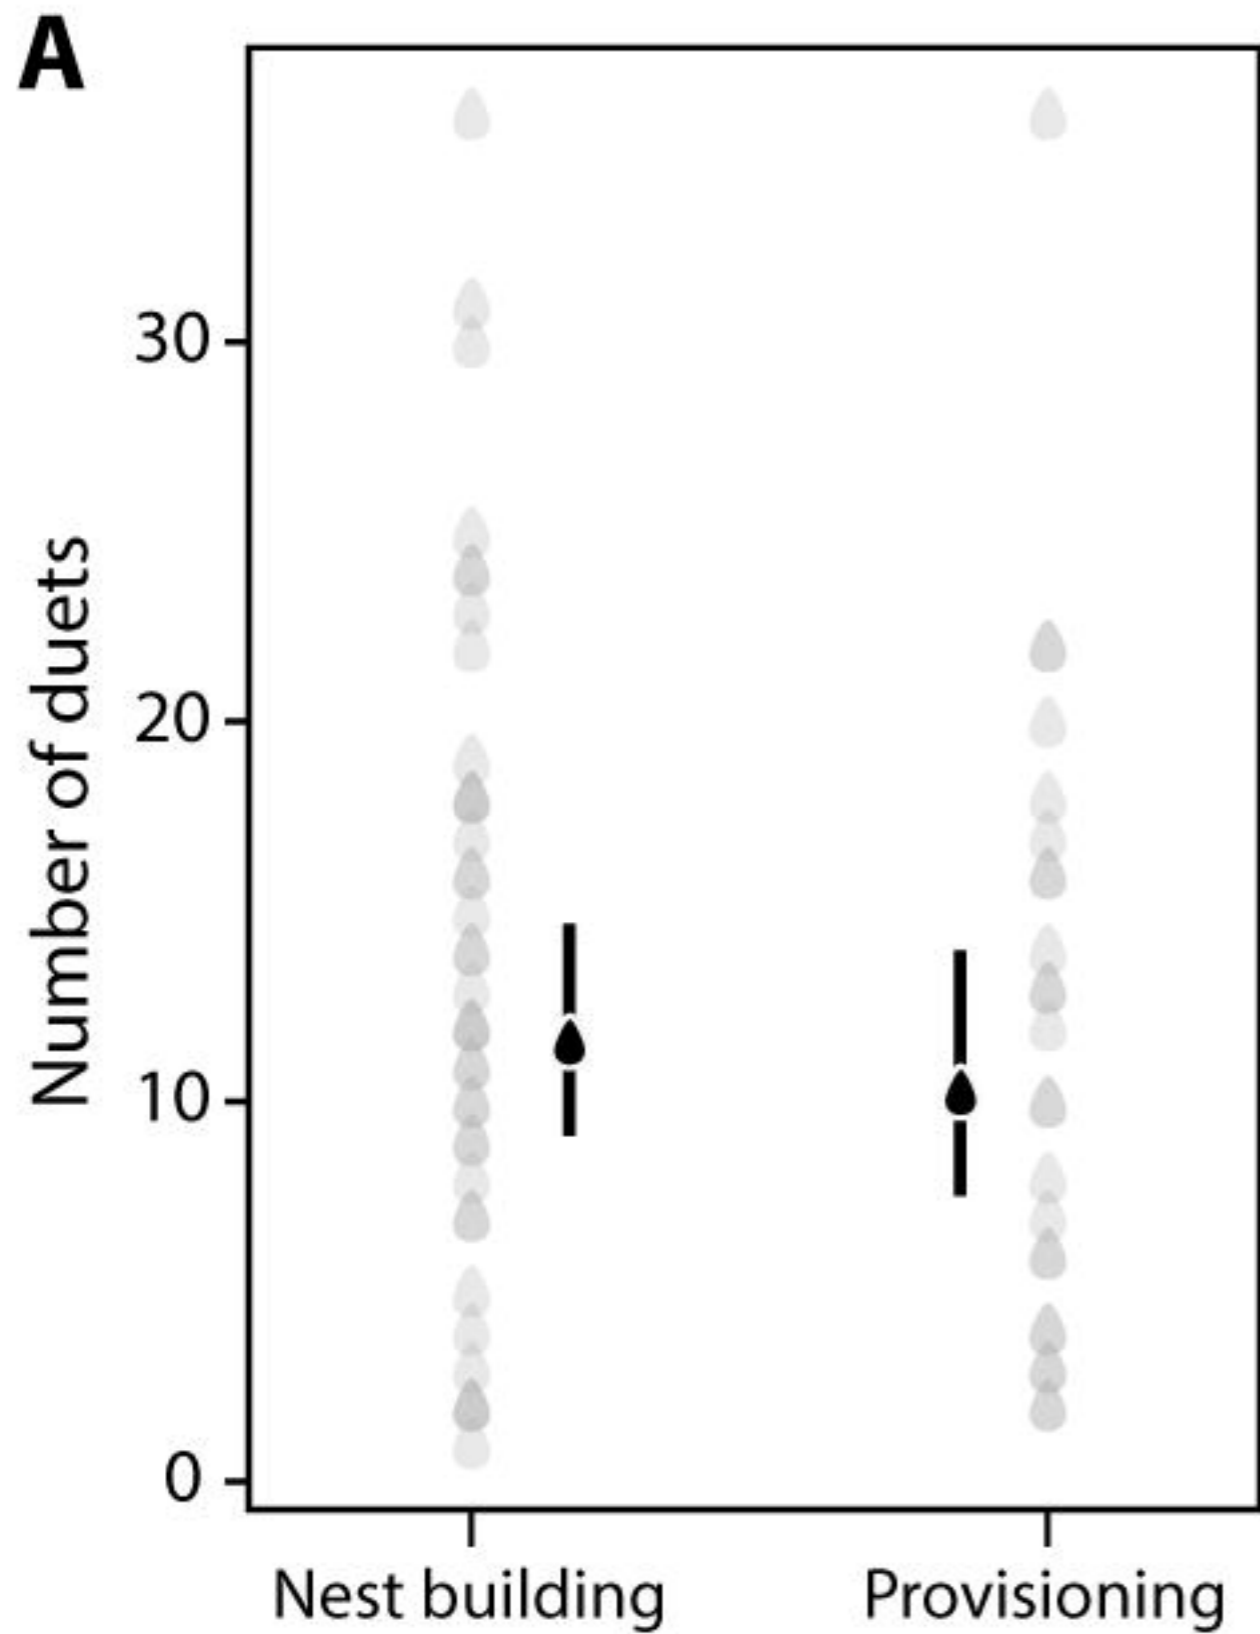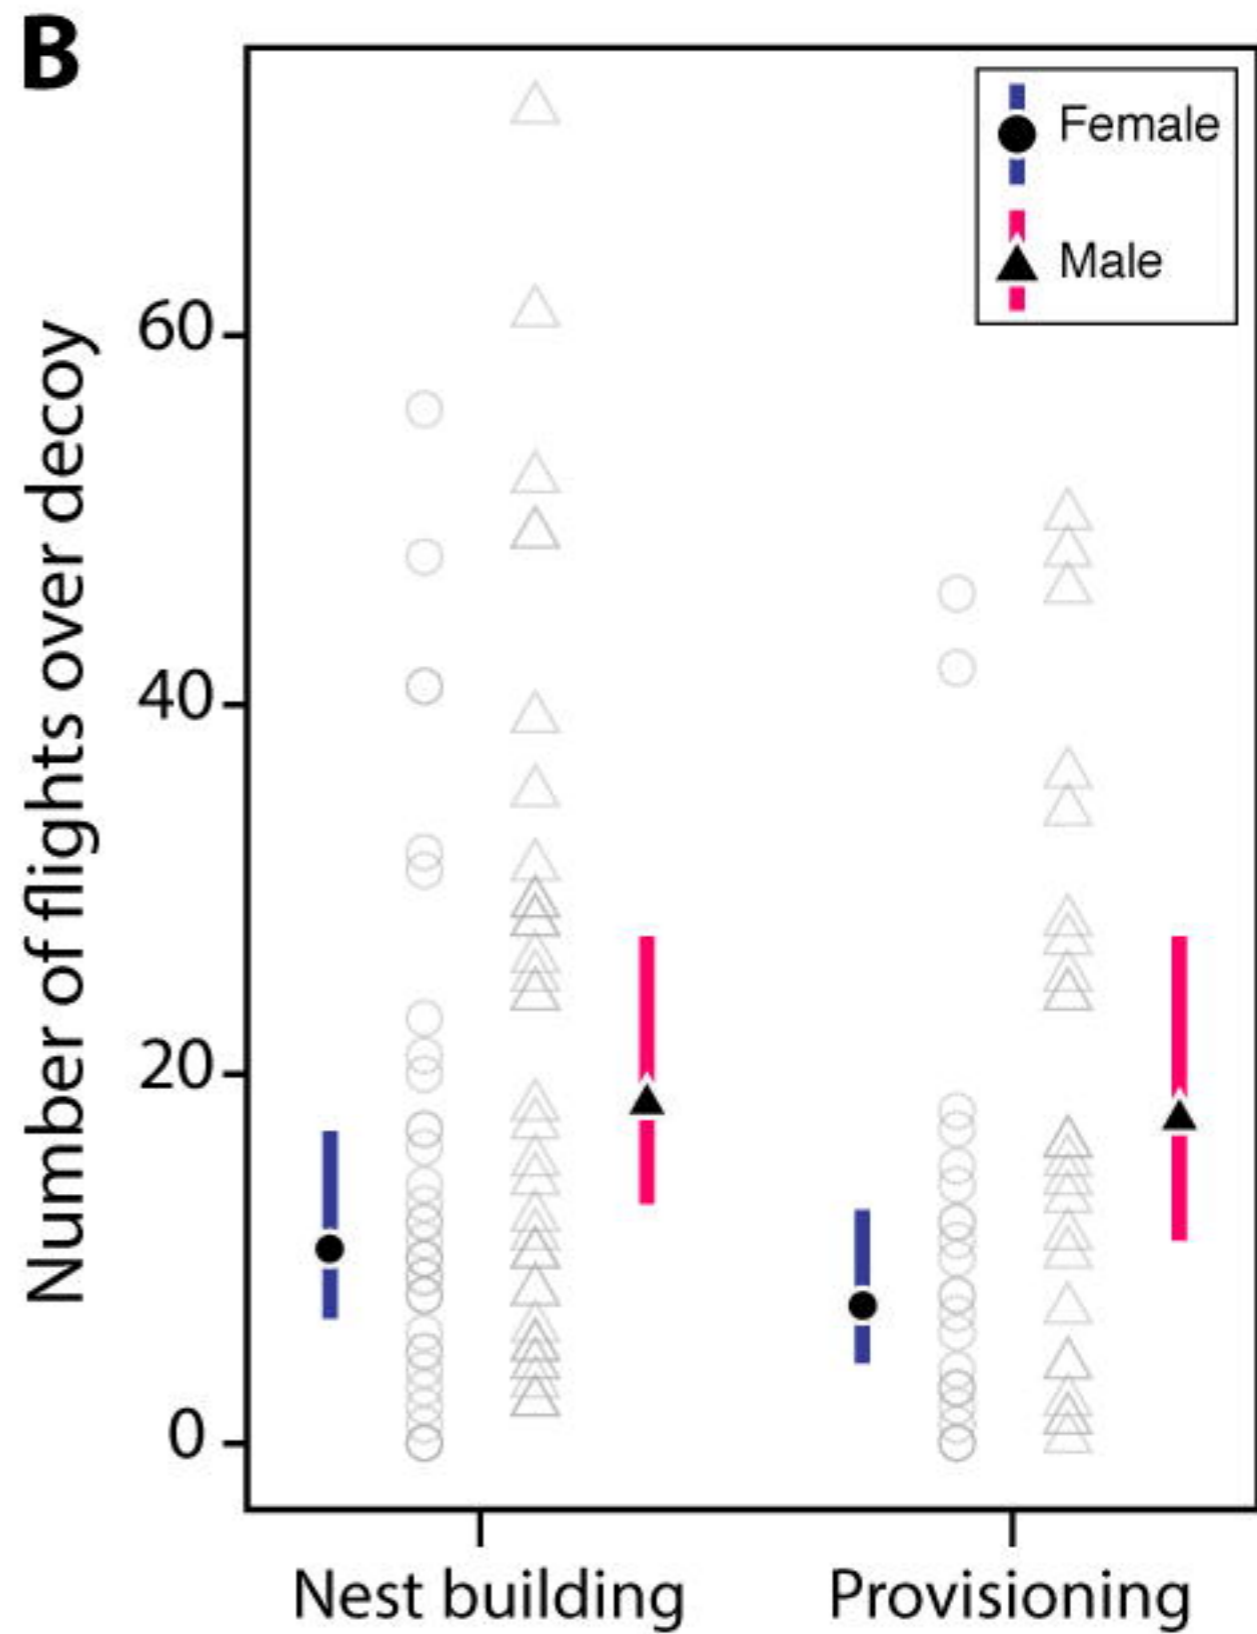

Female number of flights over decoy

Spearman Correlation Coefficient: 0.67  
 $p < 0.01$

bioRxiv preprint doi: <https://doi.org/10.1101/2020.07.29.226167>; this version posted July 29, 2020. The copyright holder for this preprint (which was not certified by peer review) is the author/funder, who has granted bioRxiv a license to display the preprint in perpetuity. It is made available under aCC-BY-NC 4.0 International license.

2.4

1.2

0

0

1.2

2.4

3.6

Male number of flights over decoy

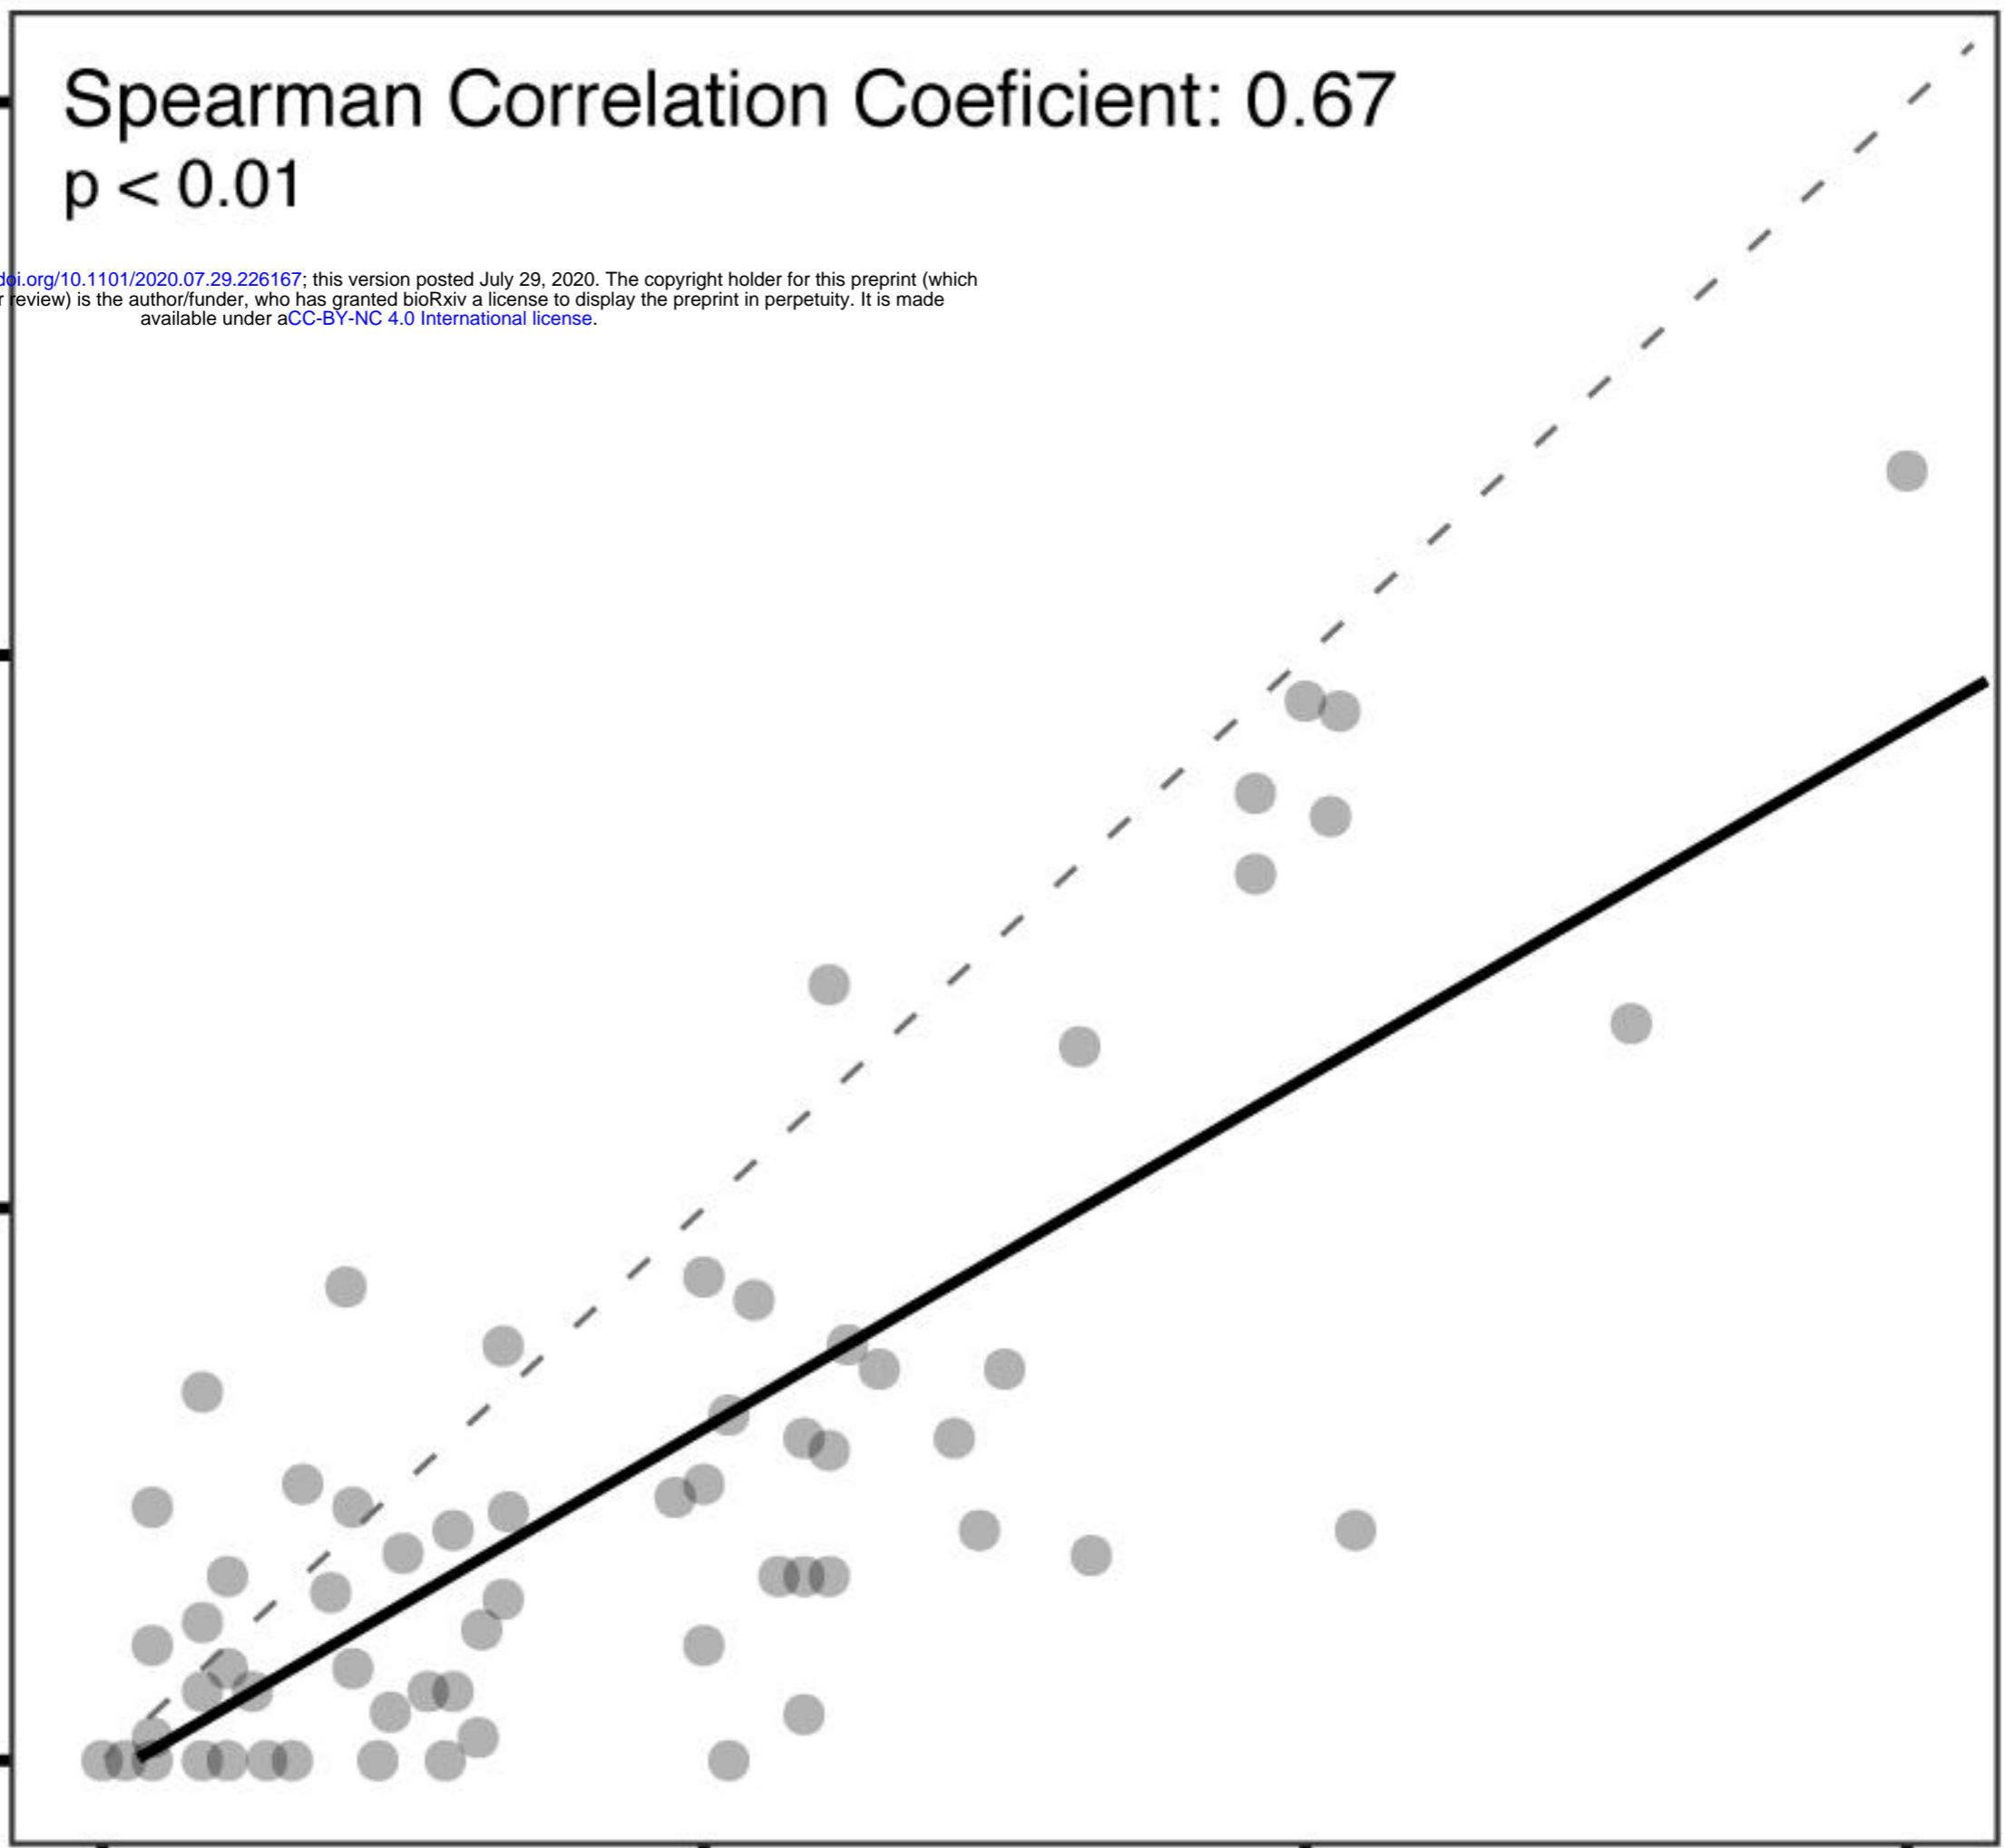

Source: https://www.biorxiv.org/content/10.1101/2020.07.29.226167v1.full.pdf
